## **MODULATION OF SIGNALLING INITIATED BY PHOSPHOINOSITIDASE-C-LINKED RECEPTORS**

RICHARD J. H. WOJCIKIEWICZ\* AND STEFAN R. NAHORSKI

*Department of Pharmacology and Therapeutics, University of Leicester, PO Box 138,  
Medical Sciences Building, University Road, Leicester, LE1 9HN, UK*

### **Summary**

An extensive group of cell surface receptors are coupled to phosphoinositidase C and thus to the production of the intracellular second messengers inositol 1,4,5-trisphosphate and 1,2-diacylglycerol. While the mechanisms and consequences of phosphoinositidase C activation have been the target of intensive study for over a decade, information is scarce regarding the regulatory processes that modulate this system during receptor stimulation. This situation, however, is now beginning to change. Recent data indicate (a) that  $\text{Ca}^{2+}$ , mobilized concurrently with activation of phosphoinositidase-C-linked receptors, is a feedback activator and amplifier of phosphoinositide hydrolysis, (b) that rapid desensitization, possibly associated with receptor phosphorylation, regulates phosphoinositidase-C-linked receptors, (c) that receptor internalization can mediate desensitization at later times and (d) that signalling can be regulated at additional sites downstream of phosphoinositidase C. These diverse regulatory events provide the means by which the breakdown of phosphoinositides and cellular responsiveness to their products are controlled during cell stimulation.

### **Introduction**

In recent years, it has emerged that many neurotransmitters, hormones and growth factors communicate with the cell interior *via* receptors coupled to isozymes of phosphoinositidase C (PIC). Activation of these enzymes catalyses phosphatidylinositol 4,5-bisphosphate [ $\text{PtdIns}(4,5)\text{P}_2$ ] hydrolysis and leads to the generation of two intracellular second messengers, inositol 1,4,5-trisphosphate [ $\text{Ins}(1,4,5)\text{P}_3$ ] and 1,2-diacylglycerol (Berridge, 1993; Nishizuka, 1992; Rhee and Choi, 1992; Cockcroft and Thomas, 1992). These are recognised, respectively, by members of the  $\text{Ins}(1,4,5)\text{P}_3$  receptor and protein kinase C families and, thus, their primary effects are to stimulate  $\text{Ca}^{2+}$  release from intracellular stores (Berridge, 1993) and to cause protein phosphorylation (Nishizuka, 1992; Hug and Sarre, 1993). In this way,  $\text{Ins}(1,4,5)\text{P}_3$  and 1,2-diacylglycerol initiate a cascade of intracellular signalling that results in effects as diverse as enhanced secretion and stimulation of cell division.

Mechanistic analyses of the activation of phosphoinositide hydrolysis have been complicated by the fact that there are currently known to be more than ten PIC isozymes

\*Present address: Department of Pharmacology, State University of New York Health Science Center at Syracuse, 750 East Adams Street, Syracuse, NY 13210-2339, USA.

Key words: phosphoinositidase C,  $\text{Ca}^{2+}$ , desensitization, inositol 1,4,5-trisphosphate.

and three discrete mechanisms by which they can be activated by receptors (Berridge, 1993; Rhee and Choi, 1992; Cockcroft and Thomas, 1992; Wu *et al.* 1993; Carozzi *et al.* 1993). These are (i) activation of PIC $\beta$ 1 by the  $\alpha$ -subunits of certain members of the  $\alpha\beta\gamma$ -heterotrimeric G-protein family, notably G<sub>q</sub> and G<sub>11</sub>, (ii) activation of PIC $\beta$ 2 and PIC $\beta$ 3 by  $\beta\gamma$  subunits of the same family and (iii) activation of PIC $\gamma$  subtypes by phosphorylation. The first and second mechanisms are characteristically utilized by hormones and neurotransmitters and the third by growth factors (Berridge, 1993).

While these mechanisms have been the target of intensive study for over a decade, surprisingly little unequivocal information has been gathered concerning modulation of signalling during stimulation of PIC-linked receptors. In part this can be accounted for by the complexity of the signalling initiated by phosphoinositide hydrolysis (Nishizuka, 1992) together with the fact that, under certain conditions, PIC may catalyse the hydrolysis of phosphatidylinositol (PtdIns) and phosphatidylinositol 4-phosphate [PtdIns(4)P], the precursors of PtdIns(4,5)P<sub>2</sub> (Baird and Nahorski, 1990; Imai and Gershengorn, 1986). Indeed, it has often been assumed that an agonist-occupied receptor is merely a 'switch' that turns PIC 'on' and that no subsequent modulation of PIC activity occurs. As we shall describe, however, this appears not to be the case. It is now becoming clear that, even during the first minute of stimulation, PIC activity is modulated by the increases in cytosolic Ca<sup>2+</sup> concentration that accompany receptor activation. Conversely, during the same period, desensitization suppresses PIC activity. This rapid desensitization seems to be a feature of all PIC-linked receptors, although its severity varies between receptor types. At later times, receptor internalization and down-regulation modulate PIC activity and signalling is also regulated at points downstream of PIC, notably at the level of the protein kinase C and Ins(1,4,5)P<sub>3</sub> receptor families.

### Regulation of PIC activity by cytosolic Ca<sup>2+</sup>

The general acceptance that phosphoinositide hydrolysis is the cause rather than an effect of Ca<sup>2+</sup> mobilization has led to a belief (discussed by Michell *et al.* 1981) that activation of phosphoinositide metabolism is independent of Ca<sup>2+</sup>. This apparently logical view has, however, been contradicted by a body of data showing that receptor-mediated phosphoinositide hydrolysis, particularly that occurring during prolonged stimulation, is dependent upon the presence of extracellular Ca<sup>2+</sup> (Meldolesi *et al.* 1991) and can be enhanced by agents that cause an influx of Ca<sup>2+</sup> into cells (Baird and Nahorski, 1990; Eberhard and Holz, 1988). Indeed, recent studies have shown that submicromolar concentrations of Ca<sup>2+</sup> can activate purified PIC subtypes reconstituted into phospholipid vesicles (Rhee and Choi, 1992; Martin *et al.* 1991) and can enhance receptor- or G-protein-stimulated phosphoinositide hydrolysis in permeabilized cells (McDonough *et al.* 1988; Fisher *et al.* 1989). Thus, the possibility exists that increases in cytosolic free Ca<sup>2+</sup> concentration ([Ca<sup>2+</sup>]<sub>i</sub>) that occur during the activation of PIC-linked receptors might enhance the already stimulated rate of phosphoinositide hydrolysis.

Agonist-induced increases in [Ca<sup>2+</sup>]<sub>i</sub> are biphasic in many cell types (Merritt and Rink, 1987; Fisher *et al.* 1989; Lambert *et al.* 1990; Stauderman and Pruss, 1990). For example, in SH-SY5Y and SK-N-SH human neuroblastoma cells, which express PIC-linked

muscarinic receptors and which have been used extensively as model systems to study intracellular signalling in neurones (Fisher *et al.* 1989; Lambert *et al.* 1990; Wojcikiewicz *et al.* 1990; Lambert *et al.* 1991), the muscarinic agonist carbachol causes a rapid, but transient, rise in  $[Ca^{2+}]_i$  that is maximal at approximately 10s (the 'peak' phase), followed 30–60s later by a lower, but sustained, elevation (the 'plateau' phase). The response of SH-SY5Y cells to carbachol and the sources of  $Ca^{2+}$  for this response are shown in Fig. 1A–D. When  $[Ca^{2+}]$  in the bathing solution is  $1.3\text{mmol l}^{-1}$  (Fig. 1A), increases in  $[Ca^{2+}]_i$  are biphasic; values of  $[Ca^{2+}]_i$  during 'peak' and 'plateau' phases being approximately  $500\text{nmol l}^{-1}$  and approximately  $200\text{nmol l}^{-1}$ , respectively. Brief pretreatment and co-incubation with the divalent cation chelator EGTA, which reduces  $[Ca^{2+}]$  in the bathing solution to approximately  $100\text{nmol l}^{-1}$  and which drastically reduces the gradient that drives  $Ca^{2+}$  entry, reduces the corresponding values to approximately  $200\text{nmol l}^{-1}$  and approximately  $70\text{nmol l}^{-1}$  (Fig. 1B). This obliteration of the 'plateau' phase of  $Ca^{2+}$  mobilization by EGTA indicates that it depends upon  $Ca^{2+}$  entry; the fact the 'peak' phase is maintained, albeit at a reduced level, indicates that it is in part sustained by release from intracellular  $Ca^{2+}$  stores.

Although these responses are typical of those initiated by many types of receptor, the extent of changes in  $[Ca^{2+}]_i$  upon stimulation of a particular receptor can vary from cell type to cell type. For example, in Chinese hamster ovary cells transfected with human m3 muscarinic receptor cDNA (CHO-m3 cells), carbachol initiates 'plateau' phases that are very small at a time when  $Ca^{2+}$  entry is known to be occurring (Tobin *et al.* 1992). This contrasts with the effects of m3 receptor stimulation in SH-SY5Y cells (Fig. 1) and suggests that additional factors, in particular the rate of  $Ca^{2+}$  extrusion from the cell, may control the level of the 'plateau'.

In order to establish directly that intracellular  $Ca^{2+}$  stores are involved in the  $Ca^{2+}$  responses of SH-SY5Y cells, thapsigargin, an inhibitor of endoplasmic reticulum  $Ca^{2+}$ -ATPases (Thastrup *et al.* 1990), was used to discharge these stores prior to addition of carbachol (Fig. 1C,D). Within 100s of its addition to SH-SY5Y cells, thapsigargin raises  $[Ca^{2+}]_i$  to a new steady state of approximately  $175\text{nmol l}^{-1}$  and addition of carbachol at this stage causes only a very small and transient increase, indicating that the  $\text{Ins}(1,4,5)P_3$ -sensitive  $Ca^{2+}$  stores normally released during muscarinic receptor activation are almost completely discharged (Fig. 1C). The subsequent slight reduction in  $[Ca^{2+}]_i$  to below approximately  $175\text{nmol l}^{-1}$  (Fig. 1C) is consistent with the idea that muscarinic receptors activate  $Ca^{2+}$  pumping from cells (Zhang *et al.* 1992). In cells preincubated with both thapsigargin and EGTA, discharge of intracellular stores does not lead to a persistent increase in  $[Ca^{2+}]_i$ , presumably because of the loss of the released  $Ca^{2+}$  to the extracellular medium and the lack of  $Ca^{2+}$  entry (Fig. 1D). Under these conditions, carbachol is totally unable to raise  $[Ca^{2+}]_i$ , which remains at  $50\text{--}70\text{nmol l}^{-1}$  throughout the treatment (Fig. 1D).

Clearly, if  $[Ca^{2+}]_i$  is involved in regulating PIC activity, then the manipulations illustrated in Fig. 1 should modulate the rate of phosphoinositide hydrolysis during stimulation. Evidence that this is the case is shown in Fig. 2. Carbachol raises the  $\text{Ins}(1,4,5)P_3$  concentration in SH-SY5Y cells with biphasic kinetics; the initial 'peak' phase is maximal at approximately 10s and is followed by a sustained 'plateau' phase

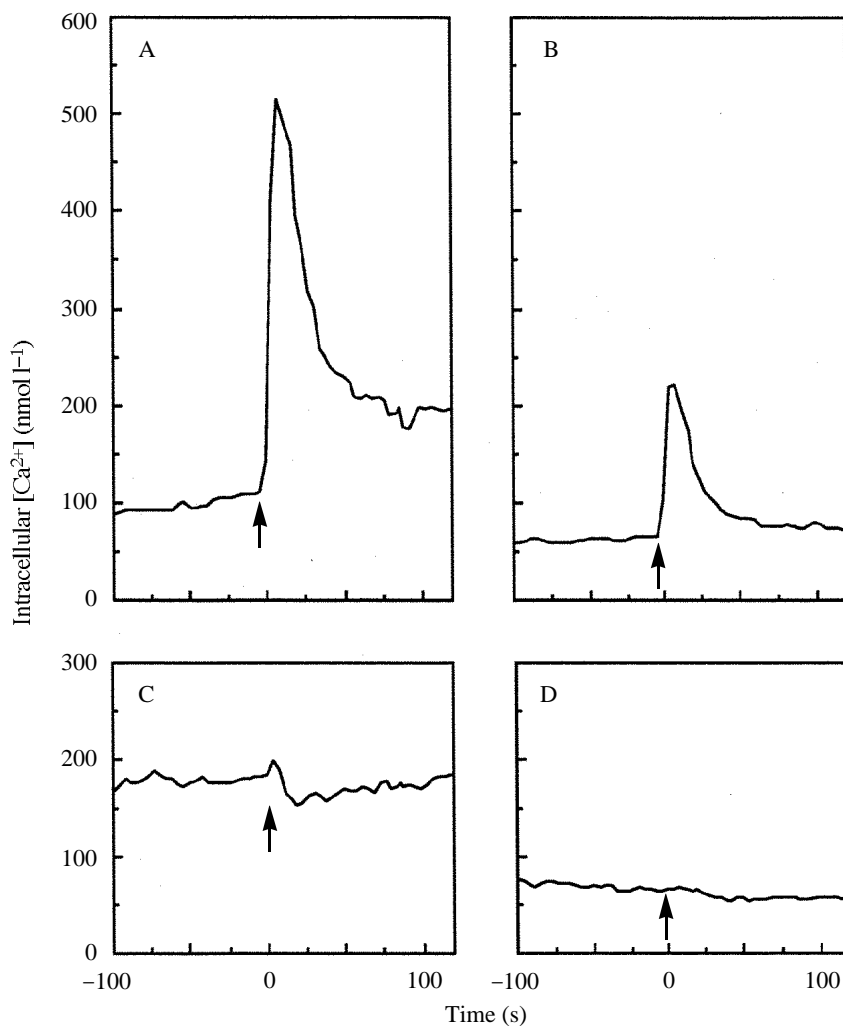

Fig. 1. Kinetics of carbachol-induced  $\text{Ca}^{2+}$  mobilization in SH-SY5Y cells.  $[\text{Ca}^{2+}]_i$  in suspensions of SH-SY5Y cells incubated in Krebs–Hepes buffer was measured using the fluorescent  $\text{Ca}^{2+}$  indicator Fura-2 (Grynkiewicz *et al.* 1985; Lambert *et al.* 1990). As indicated by the arrows at time zero, cells at  $37^\circ\text{C}$  were challenged with  $1\text{mmol l}^{-1}$  carbachol after no pretreatment (A) or after pretreatment for approximately 4 min with  $3\text{mmol l}^{-1}$  EGTA (B),  $2\ \mu\text{mol l}^{-1}$  thapsigargin (C) or  $3\text{mmol l}^{-1}$  EGTA plus  $2\ \mu\text{mol l}^{-1}$  thapsigargin (D). Addition of  $3\text{mmol l}^{-1}$  EGTA to Krebs–Hepes buffer reduced  $[\text{Ca}^{2+}]_i$  to  $101 \pm 9\text{nmol l}^{-1}$  ( $N=5$ ). Data shown are representative of three independent experiments that yielded qualitatively identical results.

from 60 to 300 s at a level 30–50% of the maximum (Fig. 2A). Pretreatment with EGTA does not alter the ‘peak’ phase but reduces the ‘plateau’ phase by approximately 70% (Fig. 2B). Similar effects can be seen after pretreatment and co-incubation with  $2.5\text{mmol l}^{-1}$   $\text{Ni}^{2+}$ , which blocks the channels that mediate agonist-induced  $\text{Ca}^{2+}$  entry (Lambert *et al.* 1990). These data establish that  $\text{Ca}^{2+}$  entry can support the ‘plateau’ phase

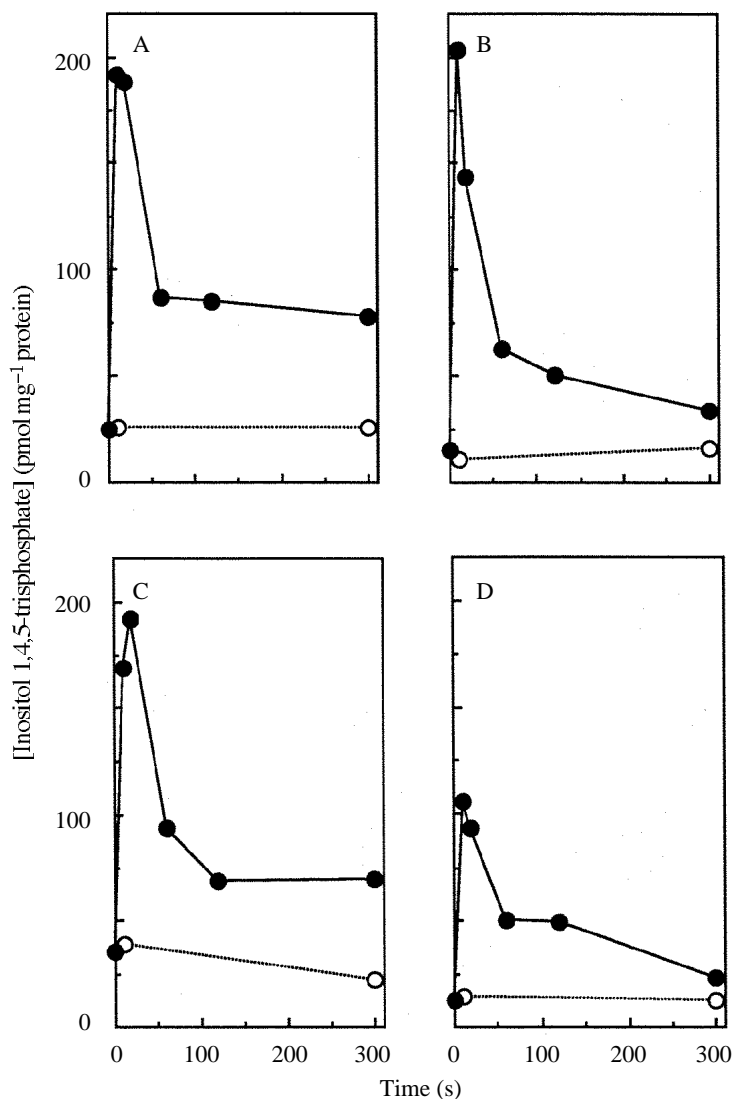

Fig. 2. Kinetics of carbachol-induced increases in Ins(1,4,5) $P_3$  mass in SH-SY5Y cells. Suspensions of cells in Krebs–Hepes buffer were preincubated for 4min at 37°C with vehicle (A), 3mmol<sup>-1</sup> EGTA (B), 2µmol<sup>-1</sup> thapsigargin (C) or EGTA plus thapsigargin (D). Samples were then incubated at 37°C without (○) or with 1mmol<sup>-1</sup> carbachol (●). Incubations were then terminated and Ins(1,4,5) $P_3$  mass was assessed (Challiss *et al.* 1990). Data shown are the means of duplicate incubations from an experiment representative of three that yielded similar results. EGTA reduced Ins(1,4,5) $P_3$  concentration during the ‘plateau’ phase (at 300s) by 67±6% and EGTA plus thapsigargin reduced Ins(1,4,5) $P_3$  concentration during the ‘peak’ phase (at 10s) by 47±4% ( $N=3$ ).

of phosphoinositide hydrolysis. While pretreatment with thapsigargin does not alter the Ins(1,4,5) $P_3$  response to carbachol (Fig. 2C), co-incubation with thapsigargin plus EGTA reduces the ‘peak’ phase of the Ins(1,4,5) $P_3$  response by approximately 50% (Fig. 2D).

Thus,  $\text{Ca}^{2+}$  from intracellular stores may also be involved in enhancing  $\text{Ins}(1,4,5)\text{P}_3$  formation during receptor activation.

In order to confirm that  $\text{Ins}(1,4,5)\text{P}_3$  formation is sufficiently sensitive to  $[\text{Ca}^{2+}]$  to be regulated by the effects of inhibition of store release and entry, the  $\text{Ca}^{2+}$  sensitivity of PIC must be examined directly. This has been done in a number of cell types following permeabilization (McDonough *et al.* 1988; Fisher *et al.* 1989). In electrically permeabilized SH-SY5Y cells (Wojcikiewicz *et al.* 1990), carbachol-stimulated  $\text{Ins}(1,4,5)\text{P}_3$  formation is very sensitive to changes in  $[\text{Ca}^{2+}]$  ( $\text{EC}_{50}=36\pm 3\text{nmol l}^{-1}$ ;  $N=5$ ). On this basis, inhibition of  $\text{Ca}^{2+}$  entry into SH-SY5Y cells during stimulation with carbachol would suppress the rate of  $\text{Ins}(1,4,5)\text{P}_3$  formation, but only during the 'plateau' phase; EGTA (Fig. 1B) reduces 'plateau'  $[\text{Ca}^{2+}]_i$  in intact cells from 150–200  $\text{nmol l}^{-1}$  to 50–70  $\text{nmol l}^{-1}$  and this correlates with a 30–40% reduction in carbachol-stimulated  $\text{Ins}(1,4,5)\text{P}_3$  formation in permeabilized cells. In contrast, 'peak'  $[\text{Ca}^{2+}]_i$  (500–600  $\text{nmol l}^{-1}$ ), while being reduced by inclusion of EGTA (Fig. 1B), remains at or above 200  $\text{nmol l}^{-1}$  and  $\text{Ins}(1,4,5)\text{P}_3$  formation is insensitive to changes in  $[\text{Ca}^{2+}]$  in this range. Only when the 'peak' of the  $\text{Ca}^{2+}$  response is totally blocked and  $[\text{Ca}^{2+}]_i$  is maintained at approximately 60  $\text{nmol l}^{-1}$  with thapsigargin and EGTA (Fig. 1D) would, on the basis of the data from permeabilized cells, the 'peak' phase of the  $\text{Ins}(1,4,5)\text{P}_3$  response be suppressed.

Overall, these data indicate that in SH-SY5Y cells muscarinic-receptor-stimulated PIC activity is sensitive enough to  $[\text{Ca}^{2+}]$  for concurrently mobilized  $\text{Ca}^{2+}$  to enhance the rate of  $\text{PtdIns}(4,5)\text{P}_2$  hydrolysis. The same conclusion can be drawn from studies with other systems, for example SK-N-SH cells (Fisher *et al.* 1989) and chick heart cells (McDonough *et al.* 1988). It must be stressed, however, that biphasic  $\text{Ins}(1,4,5)\text{P}_3$  formation is *not* a consequence of biphasic changes in  $[\text{Ca}^{2+}]_i$ . This can be concluded from the experiments with thapsigargin-pretreated SH-SY5Y cells in which carbachol-induced increases in  $[\text{Ca}^{2+}]_i$  were essentially blocked while the  $\text{Ins}(1,4,5)\text{P}_3$  response remained biphasic. These results are very similar to those in gastrin-stimulated rabbit parietal cells in which thapsigargin had no effect on the profile of  $\text{Ins}(1,4,5)\text{P}_3$  formation (Roche *et al.* 1993). Thus,  $\text{Ins}(1,4,5)\text{P}_3$  formation appears to be intrinsically biphasic;  $\text{Ca}^{2+}$  derived from intracellular or extracellular sources merely amplifies the response.

Initially, enhancement of phosphoinositide hydrolysis by increases in  $[\text{Ca}^{2+}]_i$  seems paradoxical as  $\text{Ins}(1,4,5)\text{P}_3$  releases intracellular  $\text{Ca}^{2+}$  stores (Berridge, 1993) and is involved in gating  $\text{Ca}^{2+}$  entry, either indirectly following conversion to inositol 1,3,4,5-tetrakisphosphate (Luckhoff and Clapham, 1992) or *via* capacitative refilling (Hoth and Penner, 1992), or perhaps directly *via*  $\text{Ins}(1,4,5)\text{P}_3$ -gated plasma membrane  $\text{Ca}^{2+}$  channels (Khan *et al.* 1992). Thus, in the continuous presence of agonist and with normal extracellular  $[\text{Ca}^{2+}]$ , this process might be expected to lead to uncontrolled feedback activation of PIC. Clearly, however, this does not occur, suggesting that the degree to which  $\text{PtdIns}(4,5)\text{P}_2$  is hydrolysed is in some way limited. It may be that the mechanism providing this constraint also accounts for the fact that, in SH-SY5Y and other cells, agonist-induced changes in  $\text{Ins}(1,4,5)\text{P}_3$  concentration are intrinsically biphasic (Fu *et al.* 1988; Donie and Reiser, 1991; Menniti *et al.* 1991; Lambert *et al.* 1991). Such a mechanism may also account for the fact that upon stimulation of some receptors changes

in Ins(1,4,5) $P_3$  concentration are monophasic, merely consisting of a 'peak' followed by a return within 60s to basal levels (Sugiya *et al.* 1987; Menniti *et al.* 1991). For these receptors, PtdIns(4,5) $P_2$  hydrolysis appears to be rapidly and completely terminated. Taken together, these data suggest that rapid desensitization may constrain the rate of phosphoinositide hydrolysis and that the degree to which desensitization occurs varies from receptor to receptor.

### Desensitization of phosphoinositide responses

#### *Rapid desensitization*

Based on the precedent set by other G-protein-linked receptors, notably the well-characterised  $\beta$ -adrenoceptor which stimulates adenylate cyclase and which desensitizes during the first few minutes of activation (Kassis and Fishman, 1984; Hausdorff *et al.* 1990), one might expect that similarly rapid events would regulate PIC-linked receptors. This has certainly been borne out in the action of some receptors, for example that for substance P in rat pancreatoma AR4-2J cells, which mediate responses that virtually completely disappear within 1min (Menniti *et al.* 1991). In contrast, stimulation *via* other receptors (for example, muscarinic, cholecystokinin and bombesin) is sustained (Menniti *et al.* 1991), albeit with the characteristic 'peak' and 'plateau' phases seen in SH-SY5Y cells (Fig. 2). Similarly, in bovine adrenal chromaffin cells, responses to angiotensin II are rapidly and almost completely suppressed, whereas responses to histamine are more robust and persistent (Stauderman and Pruss, 1990). These data illustrate two points: first, that apparent desensitization is rapid and, second, that receptor function can be suppressed either completely or only partially. Direct evidence that monophasic and biphasic Ins(1,4,5) $P_3$  formation results from rapid desensitization comes from recent studies showing that brief pretreatment of cells either obliterates or reduces, respectively, subsequent responses to the same agonist (Donie and Reiser, 1991; Menniti *et al.* 1991; Tobin *et al.* 1992). From such studies it can also be concluded that desensitization of PIC-linked receptors is 'homologous' rather than 'heterologous', since in almost all cases pretreatment of cells with a particular agonist suppresses subsequent responses to that agonist only (Sugiya *et al.* 1987; Dillon-Carter and Chuang, 1989; Menniti *et al.* 1991).

A major advance in the analysis of rapid desensitization has been made recently by directly measuring total phosphoinositide hydrolysis and thus PIC activity over the first minute of agonist stimulation. This has been achieved by using an assay (total inositol phosphate accumulation in the presence of  $\text{Li}^+$ ) that has been employed for over a decade (Nahorski *et al.* 1991), but with the difference that the initial rate of accumulation is now being assessed. By virtue of its ability to inhibit inositol monophosphatase uncompetitively,  $\text{Li}^+$  blocks the final step in the recycling of inositol and causes the build-up of inositol phosphates (Nahorski *et al.* 1991). Thus, total inositol phosphate accumulation in the presence of  $\text{Li}^+$  ([inositol phosphate]<sub>total</sub>) provides a measure of the rate of total phosphoinositide breakdown and, by inference, PIC activity. Indeed, as PtdIns(4,5) $P_2$  breakdown accounts for the vast majority of the phosphoinositides hydrolysed in the first few minutes following receptor activation (Imai and Gershengorn, 1986; Hughes and Putney, 1989; Batty and Nahorski, 1989), [inositol phosphate]<sub>total</sub> at

early times approximates to the rate of PtdIns(4,5) $P_2$  hydrolysis. This popular method of assessing phosphoinositide hydrolysis is, however, not without its problems. In particular, perturbation of inositol recycling by  $\text{Li}^+$  can inhibit phosphoinositide synthesis and can lead to an underestimation of receptor-mediated effects (Nahorski *et al.* 1991). However, acute measurement of  $[\text{inositol phosphate}]_{\text{total}}$  does provide a valid measure of the rate of phosphoinositide hydrolysis, as the compromising effects of  $\text{Li}^+$  will be minimal at early times.

Using  $[\text{inositol phosphate}]_{\text{total}}$  as a measure of PIC activity in AR4-2J cells exposed to bombesin (Menniti *et al.* 1991), it has been shown that the initial rate of phosphoinositide hydrolysis is approximately six times greater than that observed after 20s, suggesting that the bombesin receptor rapidly, but partially, desensitizes. Similarly, in SH-SY5Y cells,  $[\text{inositol phosphate}]_{\text{total}}$  in response to carbachol is biphasic (Fig. 3), the initial rate (from 0 to 20s) being approximately five times greater than that of the secondary rate (from 30 to 300s).

While Fig. 3 shows that phosphoinositide hydrolysis is biphasic and indicates that the PIC-linked muscarinic receptors expressed in these cells rapidly but partially desensitize, the data also suggest that this leads directly to the complex changes in  $\text{Ins}(1,4,5)P_3$

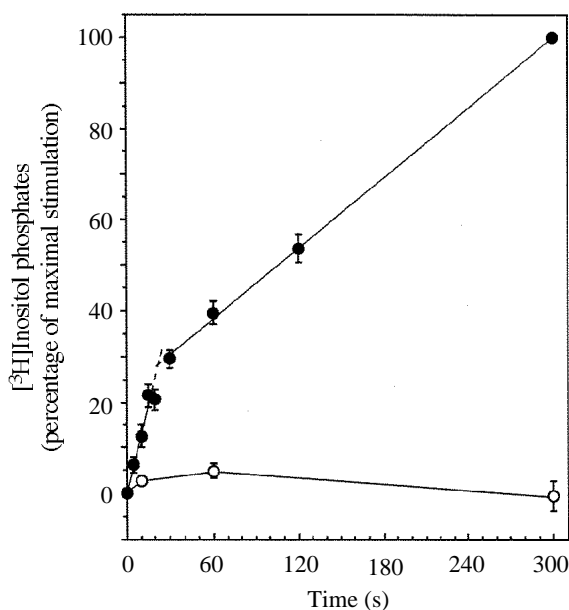

Fig. 3. Kinetics of carbachol-induced total [ $^3\text{H}$ ]inositol phosphate accumulation in SH-SY5Y cells. Suspensions of [ $^3\text{H}$ ]myo-inositol-labelled SH-SY5Y cells in Krebs-Hepes buffer (Wojcikiewicz *et al.* 1990) were preincubated for 3min at  $37^\circ\text{C}$  with  $10\text{mmol l}^{-1}$   $\text{Li}^+$ . Samples of cells were then incubated without ( $\circ$ ) or with ( $\bullet$ )  $1\text{mmol l}^{-1}$  carbachol at  $37^\circ\text{C}$  for 5–300s. Incubations were terminated and the accumulation of total [ $^3\text{H}$ ]inositol phosphates was assessed (Batty and Nahorski, 1989). Data shown are mean  $\pm$  S.E.M. of three independent experiments. Basal ( $t$  0s) and stimulated ( $t$  300s) total [ $^3\text{H}$ ]inositol phosphate accumulation were  $4800 \pm 500$  and  $18200 \pm 2900$  disintegrations  $\text{min}^{-1}$ , respectively ( $N=3$ ).



concentration during stimulation. This can be concluded because (i) at early times PtdIns(4,5) $P_2$  is the primary substrate for PIC and (ii) direct evidence that Ins(1,4,5) $P_3$  metabolism is modulated in intact cells during activation of PIC-linked receptors is lacking (Shears, 1992). Further, the transition between the two rates of inositol phosphate production (at approximately 20s) correlates temporally with biphasic changes in Ins(1,4,5) $P_3$  concentration (Fig. 2A), Ins(1,4,5) $P_3$  mass peaking at 10s and then falling to a lower but maintained level within 1min. Clearly, in the face of a constant capacity to metabolize Ins(1,4,5) $P_3$ , biphasic PtdIns(4,5) $P_2$  hydrolysis would cause the concentration of this second messenger to peak and then to decline to a lower plateau.

#### *Mechanisms of rapid desensitization*

There are a number of plausible mechanisms by which the properties of receptor–PIC coupling could be modulated to account for the differences in responsiveness to agonists during ‘peak’ and ‘plateau’ phases.

For example, PIC- $\beta_1$  is now known to stimulate the GTPase activity of  $G_q$  and  $G_{11}$  and it has been suggested that PtdIns(4,5) $P_2$  may inhibit this activity of PIC (Berstein *et al.* 1992). Thus, the 30–50% reductions in PtdIns(4,5) $P_2$  concentration that occur in the seconds following receptor activation (Michell *et al.* 1981; Martin, 1983; Chilvers *et al.* 1991) may alter the efficiency of signal transduction.

The most attractive candidate, however, for the modulatory mechanism is rapid receptor phosphorylation, since this follows the precedent set by the comprehensively studied  $\beta$ -adrenoceptor/adenylate cyclase system (Hausdorff *et al.* 1990), where occupation of a receptor with agonist induces rapid  $\beta$ -adrenoceptor phosphorylation at multiple sites, this effect being catalysed by two kinases – protein kinase A and  $\beta$ -adrenoceptor kinase ( $\beta$ ARK). As a result of these discrete phosphorylation events, which are half-maximal at approximately 2min and less than 20s, respectively (Roth *et al.* 1991), the receptor is uncoupled from its cognate G-protein and, over a period of minutes, adenylate cyclase activation is diminished (Kassis and Fishman, 1984).

It has been demonstrated recently that certain PIC-linked receptors are phosphorylated; notably, cholecystokinin receptors in intact rat pancreatic acinar cells (Klueppelberg *et al.* 1991), m3 muscarinic receptors in intact CHO-m3 cells (Tobin and Nahorski, 1993) and purified substance P receptors reconstituted with  $\beta$ ARK (Kwatra *et al.* 1993). While the latter study by no means proves that  $\beta$ ARK phosphorylates PIC-linked receptors under physiological conditions, it is entirely consistent with the studies on CHO-m3 cells, in which the m3 receptor is phosphorylated in an agonist-dependent manner by a kinase distinct from protein kinases A, protein kinase C or other  $Ca^{2+}$ -dependent kinases (Tobin and Nahorski, 1993).

Perhaps the most significant finding, however, is that phosphorylation of m3 receptors in intact cells can occur within seconds of agonist application and is, therefore, fast enough to account for rapid desensitization of the sort illustrated in Fig. 3. The cholecystokinin receptor behaves similarly, in that it is rapidly phosphorylated (Klueppelberg *et al.* 1991) and initiates biphasic phosphoinositide responses (Menniti *et al.* 1991). Thus, receptor phosphorylation may be the mediator of this regulatory event, perhaps by causing partial uncoupling of the m3 receptor from  $G_q/G_{11}$ . Indeed, it is

possible that the degree to which receptors are uncoupled from  $G_q/G_{11}$  following phosphorylation varies from receptor to receptor. This could explain why some receptors (for example, that for substance P) become almost completely desensitized within the first minute of agonist stimulation (Sugiya *et al.* 1987).

Finally, the linkage of PIC activity to cytosolic  $Ca^{2+}$  concentration may influence rapid desensitization. Clearly, if different receptors initiate  $Ca^{2+}$  responses that differ quantitatively and/or spatially, then variation in the severity of rapid desensitization might be expected. This may account for the finding in adrenal chromaffin cells that the effects of angiotensin II on phosphoinositide hydrolysis are desensitized to a much greater extent than those of histamine (Stauderman and Pruss, 1990). In these cells, histamine promotes prolonged and global increases in cytosolic  $Ca^{2+}$  concentration, whereas the effects of angiotensin II are more transient and polarized (Stauderman and Pruss, 1990; Cheek, 1991). It appears, then, that during the period over which rapid desensitization occurs, histamine receptors more effectively stimulate  $Ca^{2+}$  entry than do angiotensin II receptors. Thus, for histamine receptors, sustained increases in cytosolic  $[Ca^{2+}]$  will oppose suppressive effects on the rate of  $PtdIns(4,5)P_2$  hydrolysis and cause responses to desensitize only partially. It remains to be determined whether the same argument can be applied to other cell types where similar variation in the severity of desensitization has been noted.

#### *Receptor internalization and down-regulation*

A reduction in the number of PIC-linked receptors at the cell surface is an additional way in which desensitization can occur. For example, transfer of  $\alpha_1$ -adrenoceptors (Leeb-Lundberg *et al.* 1987) and muscarinic receptors (Eva *et al.* 1990) to a vesicular site in the cell interior (internalization) occurs with a half-time of approximately 10min in smooth muscle cells and cultured neurones, respectively, and correlates temporally with reductions in phosphoinositide responses. However, internalization is clearly not the reason for rapid partial desensitization, since in CHO-m3 cells, in which brief pretreatment with carbachol partially suppresses muscarinic receptor responsiveness, m3 receptor numbers at the cell surface remain unchanged for the first 10min of stimulation (Tobin *et al.* 1992).

As with receptors linked to adenylate cyclase (Hausdorff *et al.* 1990), prolonged stimulation can lead to a portion of internalized PIC-linked receptors being lost from the cell. This down-regulation typically occurs after stimulation for hour-long periods and, interestingly, has been shown to occur in parallel with changes in the abundance of  $G_q\alpha$  and  $G_{11}\alpha$  (Mullaney *et al.* 1993).

Although the molecular events that initiate internalization have yet to be defined, a recent analysis of human m1 muscarinic receptors has revealed that deletion of nine amino acids from a region known to be involved in coupling to  $G_q/G_{11}$  is sufficient to severely impair internalization without affecting agonist binding affinity or  $[inositol\ phosphate]_{total}$  (Lameh *et al.* 1992). Interestingly, this region is rich in serine and threonine, raising the possibility that one or more of these amino acids might be phosphorylated. Thus, as well as being associated with rapid desensitization, phosphorylation may initiate receptor internalization.

### Modulation of signalling downstream of PIC

In spite of receptor desensitization, internalization and down-regulation, agonist-stimulated PtdIns(4,5) $P_2$  hydrolysis can be maintained for hour-long periods, as indicated by a sustained increase in Ins(1,4,5) $P_3$  concentration mediated by those receptors that only partially desensitize (Wojcikiewicz and Nahorski, 1991; Tobin *et al.* 1992). Levels of 1,2-diacylglycerol can similarly be elevated persistently, albeit from sources not limited to PtdIns(4,5) $P_2$  (Kiley *et al.* 1991; Nishizuka, 1992). This raises the possibility that the actions of the intracellular proteins that recognise Ins(1,4,5) $P_3$  and 1,2-diacylglycerol might also be modulated by chronic activation of PIC-linked receptors.

For the protein kinase C family, it has been known for some time that chronic pretreatment of cells with phorbol esters causes a decrease in the cellular concentration of protein kinase C isozymes (Young *et al.* 1987; Hug and Sarre, 1993). These powerful activators, which mimic 1,2-diacylglycerol, appear to cause down-regulation of most if not all protein kinase C isozymes, albeit to differing extents and with different time courses (Huang *et al.* 1989; Akita *et al.* 1990). The mechanistic basis of this down-regulation has been examined in detail and seems to reflect accelerated degradation of active (membrane-bound) protein kinase C by the  $Ca^{2+}$ -activated neutral protease calpain (Croall and Demartino, 1991). As phorbol esters leave both protein kinase C mRNA levels and the rate of protein kinase C synthesis unchanged (Young *et al.* 1987), increased proteolysis causes its depletion.

Less is known regarding the regulation that might occur during activation of PIC-linked receptors. However, chronic stimulation of thyrotropin-releasing hormone receptors in GH<sub>4</sub>C<sub>1</sub> rat pituitary cells has been reported to cause protein kinase C down-regulation and, intriguingly, this is highly specific to a particular subtype; only the  $\epsilon$ -isozyme is down-regulated; levels of the  $\alpha$ -,  $\beta$ - and  $\delta$ -isozymes remain unchanged (Akita *et al.* 1990; Kiley *et al.* 1991). It is perhaps significant that 1,2-diacylglycerol concentration remains elevated for up to 12h in the presence of thyrotropin-releasing hormone, perhaps providing the means by which  $\epsilon$ -protein kinase C is persistently activated and proteolysed (Kiley *et al.* 1991). Although  $\epsilon$ -protein kinase C down-regulation appears to be linked with reduced transcription of certain genes (Kiley *et al.* 1991), it is not yet known whether such a specific change can sensitize cells to the effects of PIC-linked receptors and reduce the rate at which they are desensitized, as is the case after long-term exposure of certain cells to phorbol esters (Hepler *et al.* 1988).

Evidence in support of Ins(1,4,5) $P_3$  receptor desensitization has come from experiments showing that the  $Ca^{2+}$ -releasing action of Ins(1,4,5) $P_3$  is suppressed following chronic muscarinic stimulation of rabbit pancreatic acinar and SH-SY5Y cells (Willems *et al.* 1989; Wojcikiewicz and Nahorski, 1991). In SH-SY5Y cells, carbachol-pretreatment halves maximal Ins(1,4,5) $P_3$ -induced  $Ca^{2+}$  mobilization and decreases the potency of Ins(1,4,5) $P_3$  with half-maximal and maximal effects at approximately 3h and 6h, respectively (Wojcikiewicz and Nahorski, 1991). This suppression of  $Ca^{2+}$  release also reflects down-regulation, since it correlates temporally with reductions in the number of high-affinity Ins(1,4,5) $P_3$  binding sites (Wojcikiewicz and Nahorski, 1991) and type I Ins(1,4,5) $P_3$  receptor immunoreactivity (Wojcikiewicz *et al.* 1992). It remains to be

determined whether chronic PIC activation reduces the rate of type I Ins(1,4,5) $P_3$  receptor synthesis or whether, like  $\epsilon$ -protein kinase C, it is degraded more rapidly. In this regard, it is significant that the Ins(1,4,5) $P_3$  receptor has recently been shown to be cleaved by calpain (Magnusson *et al.* 1993). Development of antibodies against Ins(1,4,5) $P_3$  receptor subtypes II (Sudhof *et al.* 1991) and III (Blondel *et al.* 1993) will enable the specificity of this regulation to be determined.

Whether Ins(1,4,5) $P_3$  receptor down-regulation is occurs in other cell types is not yet known. However, it seems likely that such regulation will be associated with those receptors (e.g. muscarinic and bombesin) that are only partially desensitized during chronic stimulation. In cells with these receptors, in which agonists can persistently elevate Ins(1,4,5) $P_3$  concentration, decreasing responsiveness to Ins(1,4,5) $P_3$  represents a potentially very important mechanism for limiting  $Ca^{2+}$  release from internal stores and, thus, for limiting the role of  $Ca^{2+}$  as an intracellular signal.

### Conclusions

Diverse mechanisms modulate the signalling initiated by PIC-linked receptors. Some of these mechanisms, for example the receptor internalization and eventual down-regulation that occur during long-term treatment with agonists, are paralleled by receptors linked to other effectors – notably, adenylyl cyclase. In contrast, other modulatory features seem to be unique to PIC-mediated signalling. In particular, two opposing factors appear to regulate phosphoinositide hydrolysis during the first minute of muscarinic receptor stimulation. The first is an increase in  $[Ca^{2+}]_i$  that enhances PIC-catalysed PtdIns(4,5) $P_2$  hydrolysis. The second is a decrease in the stimulated rate of phosphoinositide hydrolysis that occurs after approximately 20s and which seems to vary from receptor to receptor in its severity. Finally, for those receptors that only partially desensitize, down-regulation of Ins(1,4,5) $P_3$  receptor and protein kinase C subtypes provides a means by which both  $Ca^{2+}$  release from internal stores and the roles of  $Ca^{2+}$  and 1,2-diacylglycerol as intracellular signals can be limited.

The authors wish to thank Dr A. B. Tobin for helpful discussions and the Wellcome Trust for financial support.

### References

- AKITA, Y., OHNO, S., YAJIMA, Y. AND SUZUKI, K. (1990). Possible role of  $Ca^{2+}$ -independent protein kinase C isozyme, nPKC $\epsilon$ , in thyrotropin-releasing hormone-stimulated signal transduction. *Biochem. biophys. Res. Commun.* **172**, 184–189.
- BAIRD, J. G. AND NAHORSKI, S. R. (1990). Increased intracellular calcium stimulates  $^3H$ -inositol polyphosphate accumulation in rat cerebral cortical slices. *J. Neurochem.* **54**, 555–561.
- BATTY, I. H. AND NAHORSKI, S. R. (1989). Rapid accumulation and sustained turnover of inositol phosphates in cerebral-cortex slices after muscarinic-receptor stimulation. *Biochem. J.* **260**, 237–241.
- BERRIDGE, M. J. (1993). Inositol trisphosphate and calcium signalling. *Nature* **361**, 315–325.
- BERSTEIN, G., BLANK, J. L., JHON, D.-Y., EXTON, J. H., RHEE, S. G. AND ROSS, E. M. (1992). Phospholipase c- $\beta_1$  is a GTPase-activating protein for  $G_q/G_{11}$ , its physiologic regulator. *Cell* **70**, 411–418.

- BLONDEL, O., TAKEDA, J., JANSSEN, H., SEINO, S. AND BELL, G. I. (1993). Sequence and functional characterization of a third inositol trisphosphate receptor subtype, InsP<sub>3</sub>R-3, expressed in pancreatic islets, kidney, gastrointestinal tract, and other tissues. *J. Biol. Chem.* **268**, 11356–11363.
- CAROZZI, A., CAMPS, M., GIERSCHIK, P. AND PARKER, P. J. (1993). Activation of phosphatidylinositol lipid-specific phospholipase C- $\beta$ 3 by G-protein  $\beta\gamma$  subunits. *FEBS Lett.* **315**, 340–342.
- CHALLISS, R. A. J., CHILVERS, E. R., WILLCOCKS, A. L. AND NAHORSKI, S. R. (1990). Heterogeneity of [<sup>3</sup>H]inositol 1,4,5-trisphosphate binding sites in adrenal-cortical membranes. *Biochem. J.* **256**, 1083–1086.
- CHEEK, T. R. (1991). Calcium signalling and the triggering of secretion in adrenal chromaffin cells. *Pharmac. Ther.* **52**, 173–189.
- CHILVERS, E. R., BATTY, I. H., CHALLISS, R. A. J., BARNES, P. J. AND NAHORSKI, S. R. (1991). Determination of mass changes in phosphatidylinositol 4,5-bisphosphate and evidence for agonist-stimulated metabolism of inositol 1,4,5-trisphosphate in airway smooth muscle. *Biochem. J.* **275**, 373–379.
- COCKCROFT, S. AND THOMAS, G. M. H. (1992). Inositol-lipid-specific phospholipase C isoenzymes and their differential regulation by receptors. *Biochem. J.* **288**, 1–14.
- CROALL, D. E. AND DEMARTINO, G. N. (1991). Calcium-activated neutral protease (calpain) system: structure, function and regulation. *Physiol. Rev.* **71**, 813–847.
- DILLON-CARTER, O. AND CHUANG, D.-M. (1989). Homologous desensitization of muscarinic cholinergic, histaminergic, adrenergic, and serotonergic receptors coupled to phospholipase C in cerebellar granule cells. *J. Neurochem.* **52**, 598–603.
- DONIE, F. AND REISER, G. (1991). Mass measurements of inositol 1,4,5-trisphosphate and inositol 1,3,4,5-tetrakisphosphate in a neuronal cell line stimulated with bradykinin: inositolphosphate response shows desensitization. *Biochem. biophys. Res. Commun.* **181**, 997–1003.
- EBERHARD, D. A. AND HOLZ, R. W. (1988). Intracellular Ca<sup>2+</sup> activates phospholipase C. *Trends Neurosci.* **11**, 517–520.
- EVA, C., GAMALERO, S. R., GENAZZANI, E. AND COSTA, E. (1990). Molecular mechanisms of homologous desensitization and internalization of muscarinic receptors in primary cultures of neonatal corticostriatal neurons. *J. Pharmac. exp. Ther.* **253**, 257–265.
- FISHER, S. K., DOMASK, L. M. AND ROLAND, R. M. (1989). Muscarinic receptor regulation of cytoplasmic Ca<sup>2+</sup> concentrations in human SK-N-SH neuroblastoma cells: Ca<sup>2+</sup> requirements for phospholipase C activation. *Molec. Pharmac.* **35**, 195–204.
- FU, T., OKANO, Y. AND NOZAWA, Y. (1988). Bradykinin-induced generation of inositol 1,4,5-trisphosphate in fibroblasts and neuroblastoma cells: Effects of pertussis toxin, extracellular calcium and down-regulation of protein kinase C. *Biochem. biophys. Res. Commun.* **157**, 1429–1435.
- GRYNKIEWICZ, G., POENIE, M. AND TSIEN, R. Y. (1985). A new generation of Ca<sup>2+</sup> indicators with greatly improved fluorescence properties. *J. Biol. Chem.* **260**, 3440–3450.
- HAUSDORFF, W. P., CARON, M. G. AND LEFKOWITZ, R. J. (1990). Turning off the signal: desensitization of  $\beta$ -adrenergic receptor function. *FASEB J.* **4**, 2881–2889.
- HEPLER, J. R., EARP, H. S. AND HARDEN, T. K. (1988). Long-term phorbol ester treatment down-regulates protein kinase C and sensitizes the phosphoinositide signaling pathway to hormone and growth factor stimulation. *J. Biol. Chem.* **263**, 7610–7619.
- HOTH, M. AND PENNER, R. (1992). Depletion of intracellular calcium stores activates a calcium current in mast cells. *Nature* **355**, 353–356.
- HUANG, F. L., YOSHIDA, Y., CUNHA-MELO, J. R., BEAVEN, M. A. AND HUANG, K.-P. (1989). Differential down-regulation of protein kinase C isozymes. *J. Biol. Chem.* **264**, 4238–4243.
- HUG, H. AND SARRE, T. F. (1993). Protein kinase C isoenzymes: divergence in signal transduction? *Biochem. J.* **291**, 329–343.
- HUGHES, A. R. AND PUTNEY, J. W., JR (1989). Source of <sup>3</sup>H-labeled inositol bis- and monophosphates in agonist activated rat parotid acinar cells. *J. Biol. Chem.* **264**, 9400–9407.
- IMAI, A. AND GERSHENGORN, M. C. (1986). PIP<sub>2</sub> turnover is transient while PI turnover is persistent in thyrotropin-releasing hormone-stimulated rat pituitary cells. *Proc. natn. Acad. Sci. U.S.A.* **83**, 8540–8544.
- KASSIS, S. AND FISHMAN, P. H. (1984). Functional alteration of the  $\beta$ -adrenergic receptor during desensitization of mammalian adenylate cyclase by  $\beta$ -agonists. *Proc. natn. Acad. Sci. U.S.A.* **81**, 6686–6690.

- KHAN, A. A., STEINER, J. P., KLEIN, M. G., SCHNEIDER, M. F. AND SNYDER, S. H. (1992). IP<sub>3</sub> receptor: localization to plasma membrane of T cells and cocapping with the T cell receptor. *Science* **257**, 815–818.
- KILEY, S. C., PARKER, P. J., FABBRO, D. AND JAKEN, S. (1991). Differential regulation of protein kinase C isozymes by thyrotropin-releasing hormone in GH<sub>4</sub>C<sub>1</sub> cells. *J. biol. Chem.* **266**, 23761–23768.
- KLUEPPELBERG, U. G., GATES, L. K., GORELICK, F. S. AND MILLER, L. J. (1991). Agonist-regulated phosphorylation of the pancreatic cholecystokinin receptor. *J. biol. Chem.* **266**, 2403–2408.
- LAMBERT, D. G., CHALLISS, R. A. J. AND NAHORSKI, S. R. (1991). Accumulation and metabolism of Ins(1,4,5)P<sub>3</sub> and Ins(1,4,5)P<sub>4</sub> in muscarinic receptor-stimulated SH-SY5Y neuroblastoma cells. *Biochem. J.* **273**, 791–794.
- LAMBERT, D. G., WHITHAM, E. M., BAIRD, J. G. AND NAHORSKI, S. R. (1990). Different mechanisms of Ca<sup>2+</sup> entry induced by depolarization and muscarinic receptor stimulation in SH-SY5Y human neuroblastoma cells. *Molec. Brain Res.* **8**, 263–266.
- LAMEH, J., PHILIP, M., SHARMA, Y. K., MORO, O., RAMACHANDRAN, J. AND SADEE, W. (1992). Hm1 muscarinic cholinergic receptor internalization requires a domain in the third intracellular loop. *J. biol. Chem.* **267**, 13406–13412.
- LEEB-LUNDBERG, L. M. F., COTECCHIA, S., DEBLASI, A., CARON, M. G. AND LEFKOWITZ, R. J. (1987). Regulation of adrenergic receptor function by phosphorylation. *J. biol. Chem.* **262**, 3098–3105.
- LUCKHOFF, A. AND CLAPHAM, D. E. (1992). Inositol 1,3,4,5-tetrakisphosphate activates an endothelial Ca<sup>2+</sup>-permeable channel. *Nature* **355**, 356–358.
- MAGNUSSON, A., HAUG, L. S., WALAAS, S. I. AND OSTVOLD, A. C. (1993). Calcium-induced degradation of the inositol(1,4,5)-trisphosphate receptor/Ca<sup>2+</sup>-channel. *FEBS Lett.* **323**, 229–232.
- MARTIN, T. F. J. (1983). Thyrotropin-releasing hormone rapidly activates the phosphodiester hydrolysis of polyphosphoinositides in GH<sub>3</sub> pituitary cells. *J. biol. Chem.* **261**, 2918–2927.
- MARTIN, T. F. J., LEWIS, J. E. AND KOWALCHYK, J. A. (1991). Phospholipase C-β1 is regulated by a pertussis toxin-insensitive G-protein. *Biochem. J.* **280**, 753–760.
- MCDONOUGH, P. M., GOLDSTEIN, D. AND BROWN, J. H. (1988). Elevation of cytoplasmic calcium concentration stimulates hydrolysis of phosphatidylinositol bisphosphate in chick heart cells: Effects of sodium channel activators. *Molec. Pharmac.* **33**, 310–315.
- MELDOLESI, J., CLEMENTI, E., FASOLATO, C., ZACCHETTI, D. AND POZZAN, T. (1991). Ca<sup>2+</sup> influx following receptor activation. *Trends pharmac. Sci.* **12**, 289–292.
- MENNITI, F. S., TAKEMURA, H., OLIVER, K. G. AND PUTNEY, J. W. JR (1991). Different modes of regulation for receptors activating phospholipase C in the rat pancreatoma cell line AR4-2J. *Molec. Pharmac.* **40**, 727–733.
- MERRITT, J. E. AND RINK, T. J. (1987). The effects of substance P and carbachol on inositol tris- and tetrakisphosphate formation and cytosolic free calcium in rat parotid acinar cells. *J. biol. Chem.* **262**, 14912–14916.
- MICHELL, R. H., KIRK, C. J., JONES, L. M., DOWNES, C. P. AND CREBA, J. A. (1981). The stimulation of inositol lipid metabolism that accompanies calcium mobilization in stimulated cells: defined characteristics and unanswered questions. *Phil. Trans. R. Soc. Lond. B* **296**, 123–137.
- MULLANEY, I., MITCHELL, F. M., MCCALLUM, F., BUCKLEY, N. AND MILLIGAN, G. (1993). The human muscarinic M1 acetylcholine receptor, when expressed in CHO cells, activates and downregulates both G<sub>q</sub> and G<sub>11</sub> equally and non-selectively. *FEBS Lett.* **324**, 241–245.
- NAHORSKI, S. R., RAGAN, C. I. AND CHALLISS, R. A. J. (1991). Lithium and the phosphoinositide cycle: an example of uncompetitive inhibition and its pharmacological consequences. *Trends pharmac. Sci.* **12**, 297–303.
- NISHIZUKA, Y. (1992). Intracellular signaling by hydrolysis of phospholipids and activation of protein kinase C. *Science* **258**, 607–614.
- RHEE, S. G. AND CHOI, K. D. (1992). Regulation of inositol phospholipid-specific phospholipase C isozymes. *J. biol. Chem.* **267**, 12392–12396.
- ROCHE, S., BALI, J. P. AND MAGOUS, R. (1993). Receptor-operated Ca<sup>2+</sup> channels in gastric parietal cells: gastrin and carbachol induce Ca<sup>2+</sup> influx in depleting intracellular Ca<sup>2+</sup> stores. *Biochem. J.* **289**, 117–124.
- SHEARS, S. B. (1992) Metabolism of inositol phosphates. *Adv. second Messenger Phosphoprotein Res.* **26**, 63–92.
- STAUDERMAN, K. A. AND PRUSS, R. M. (1990). Different patterns of agonist-stimulated increases of <sup>3</sup>H-

- inositol phosphate isomers and cytosolic  $\text{Ca}^{2+}$  in bovine adrenal chromaffin cells: Comparison of the effects of histamine and angiotensin II. *J. Neurochem.* **54**, 946–953.
- SUDHOF, T. C., NEWTON, C. L., ARCHER III, B. T., USHKARYOV, Y. A. AND MIGNERY, G. A. (1991). Structure of a novel  $\text{InsP}_3$  receptor. *EMBO J.* **10**, 3199–3206.
- SUGIYA, H., TENNES, K. A. AND PUTNEY, J. W., JR (1987). Homologous desensitization of substance-P-induced inositol polyphosphate formation in rat parotid acinar cells. *Biochem. J.* **244**, 647–653.
- THASTRUP, O., CULLEN, P. J., DROBAK, B. K., HANLEY, M. R. AND DAWSON, A. P. (1990). Thapsigargin, a tumour promoter, discharges intracellular  $\text{Ca}^{2+}$  stores by specific inhibition of the endoplasmic reticulum  $\text{Ca}^{2+}$ -ATPase. *Proc. natn. Acad. Sci. U.S.A.* **87**, 2466–2470.
- TOBIN, A. B., LAMBERT, D. G. AND NAHORSKI, S. R. (1992). Rapid desensitization of muscarinic m3 receptor-stimulated polyphosphoinositide responses. *Molec. Pharmac.* **42**, 1042–1048.
- TOBIN, A. B. AND NAHORSKI, S. R. (1993). Rapid agonist-mediated phosphorylation of m3-muscarinic receptors revealed by immunoprecipitation. *J. biol. Chem.* **268**, 9817–9823.
- WILLEMS, P. H. G. M., VAN DEN BROEK, B. A. M., VAN OS, C. H. AND DE PONT, J. J. H. H. M. (1989). Inhibition of inositol 1,4,5-trisphosphate-induced  $\text{Ca}^{2+}$  release in permeabilized pancreatic acinar cells by hormonal and phorbol ester pretreatment. *J. biol. Chem.* **264**, 9762–9767.
- WOJCIKIEWICZ, R. J. H., LAMBERT, D. G. AND NAHORSKI, S. R. (1990). Regulation of muscarinic agonist-induced activation of phosphoinositidase C in electrically permeabilized SH-SY5Y human neuroblastoma cells by guanine nucleotides. *J. Neurochem.* **54**, 676–685.
- WOJCIKIEWICZ, R. J. H. AND NAHORSKI, S. R. (1991). Chronic muscarinic stimulation of SH-SY5Y neuroblastoma cells suppresses inositol 1,4,5-trisphosphate action. *J. biol. Chem.* **266**, 22234–22241.
- WU, D., KATZ, A. AND SIMON, M. I. (1993). Activation of phospholipase C  $\beta 2$  by the  $\alpha$  and  $\beta\gamma$  subunits of trimeric GTP-binding proteins. *Proc. natn. Acad. Sci. U.S.A.* **90**, 5297–5301.
- YOUNG, S., PARKER, P. J., ULLRICH, A. AND STABEL, S. (1987). Down-regulation of protein kinase C is due to an increased rate of degradation. *Biochem. J.* **244**, 775–779.
- ZHANG, B.-X., ZHAO, H., LOESSBERG, P. AND MUALLEM, S. (1992). Activation of the plasma membrane  $\text{Ca}^{2+}$  pump during agonist stimulation of pancreatic acini. *J. biol. Chem.* **267**, 15419–15425.
